# Supplementary material for: Oxytocin enhances observational fear in mice
Source: PubMed Central journal article supplement (PMC5727393; doi:10.1038/s41467-017-02279-5), 2017-12-13
Supplement: 41467_2017_2279_MOESM1_ESM.pdf [file 41467_2017_2279_MOESM1_ESM.pdf]

**SUPPLEMENTARY INFORMATION**

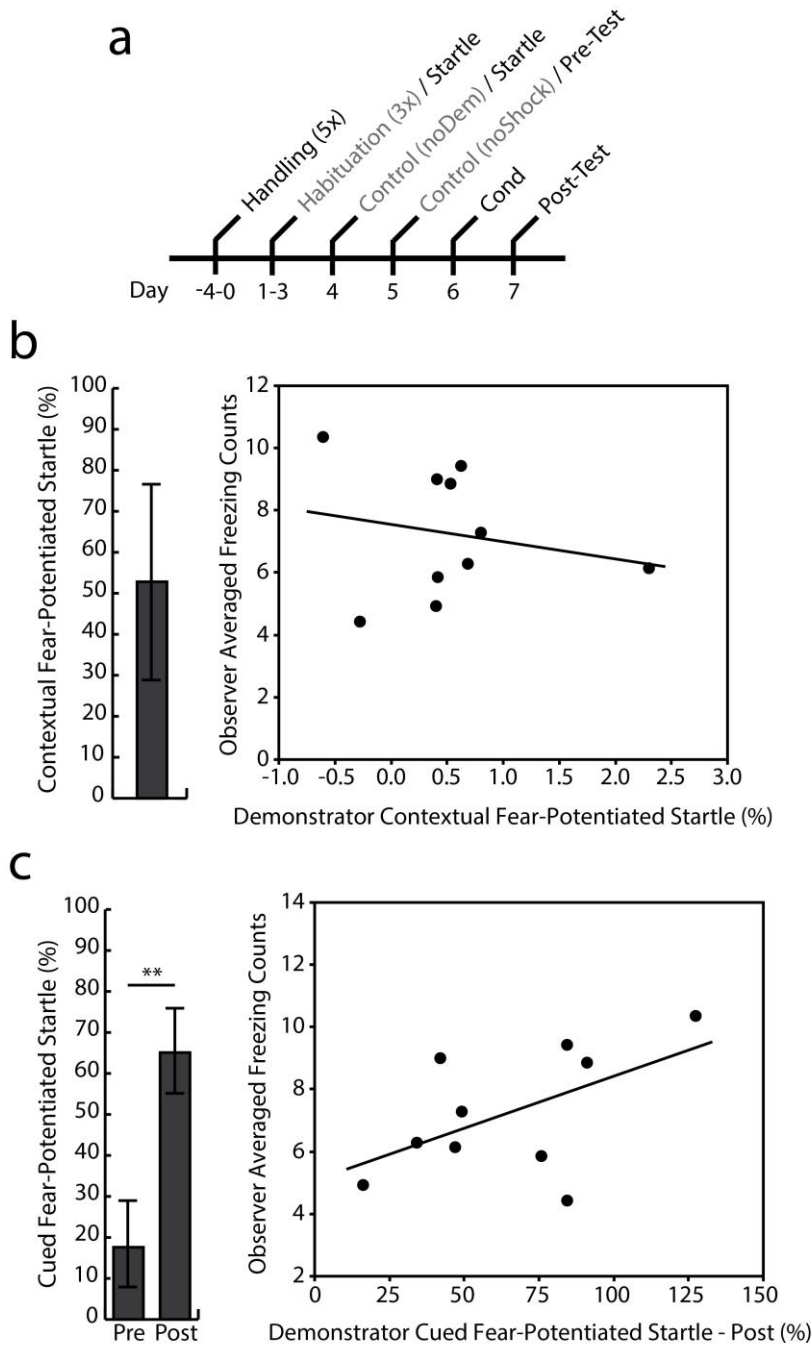

**Supplementary Figure 1. Demonstrator fear conditioning.** (a) Schematic timeline of demonstrator testing for explicit fear (black), compared with social fear (gray). (b) (left) Demonstrators ( $n = 10$ ) express fear-potentiated startle (FPS) to contextual cues, which is not correlated (right) with observer freezing during conditioning (Pearson  $R^2 = 0.294$ ,  $p = 0.105$ ). (c) (left) Demonstrators express significantly elevated cued FPS at post-test (two-tailed student's  $t$  test:  $t(9) = 3.52$ ,  $p = 0.007$ ) which shows (right) a near-significant correlation with observer freezing during conditioning (Pearson  $R^2 = 0.294$ ,  $p = 0.105$ ). Error bars represent s.e.m. \*\*  $p < 0.01$ .

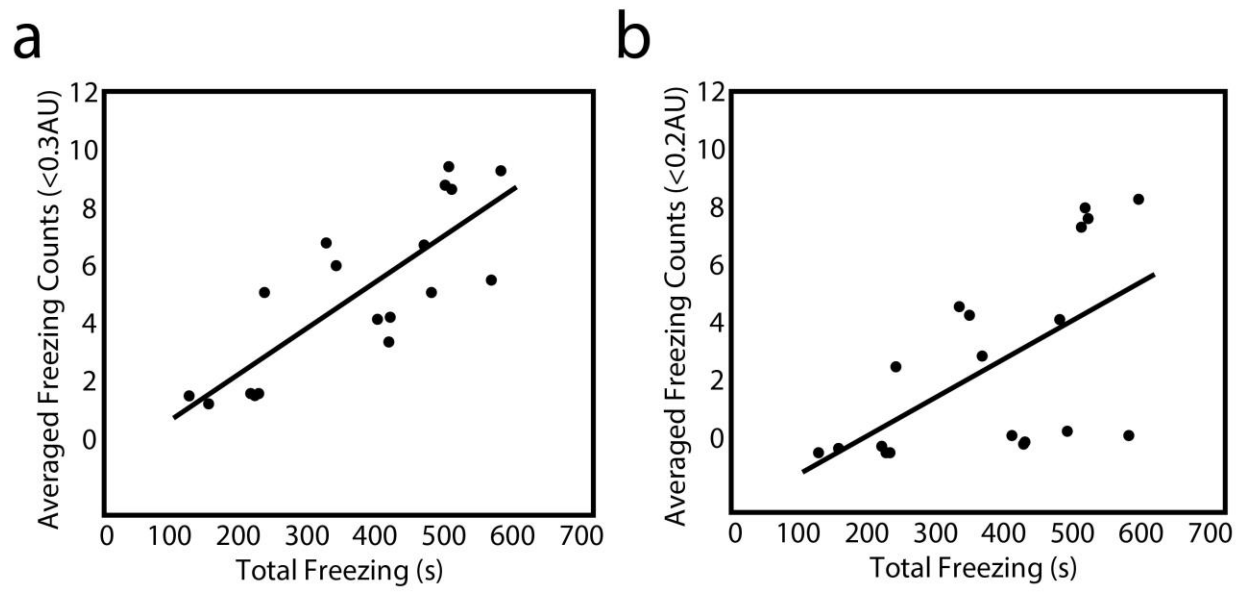

**Supplementary Figure 2. Validation of automated freezing behavior.** Automated averaged freezing counts and manual scoring of total freezing behavior are significantly correlated using a (a) <math><0.3\text{AU}</math> locomotor activity threshold (Pearson  $R^2 = 0.65$ ;  $p < 0.0001$ ), compared to a (b) <math><0.2\text{AU}</math> threshold (Pearson  $R^2 = 0.34$ ;  $p = 0.009$ ). Data represents DREADD animals ( $n = 19$ ; see Fig 4).

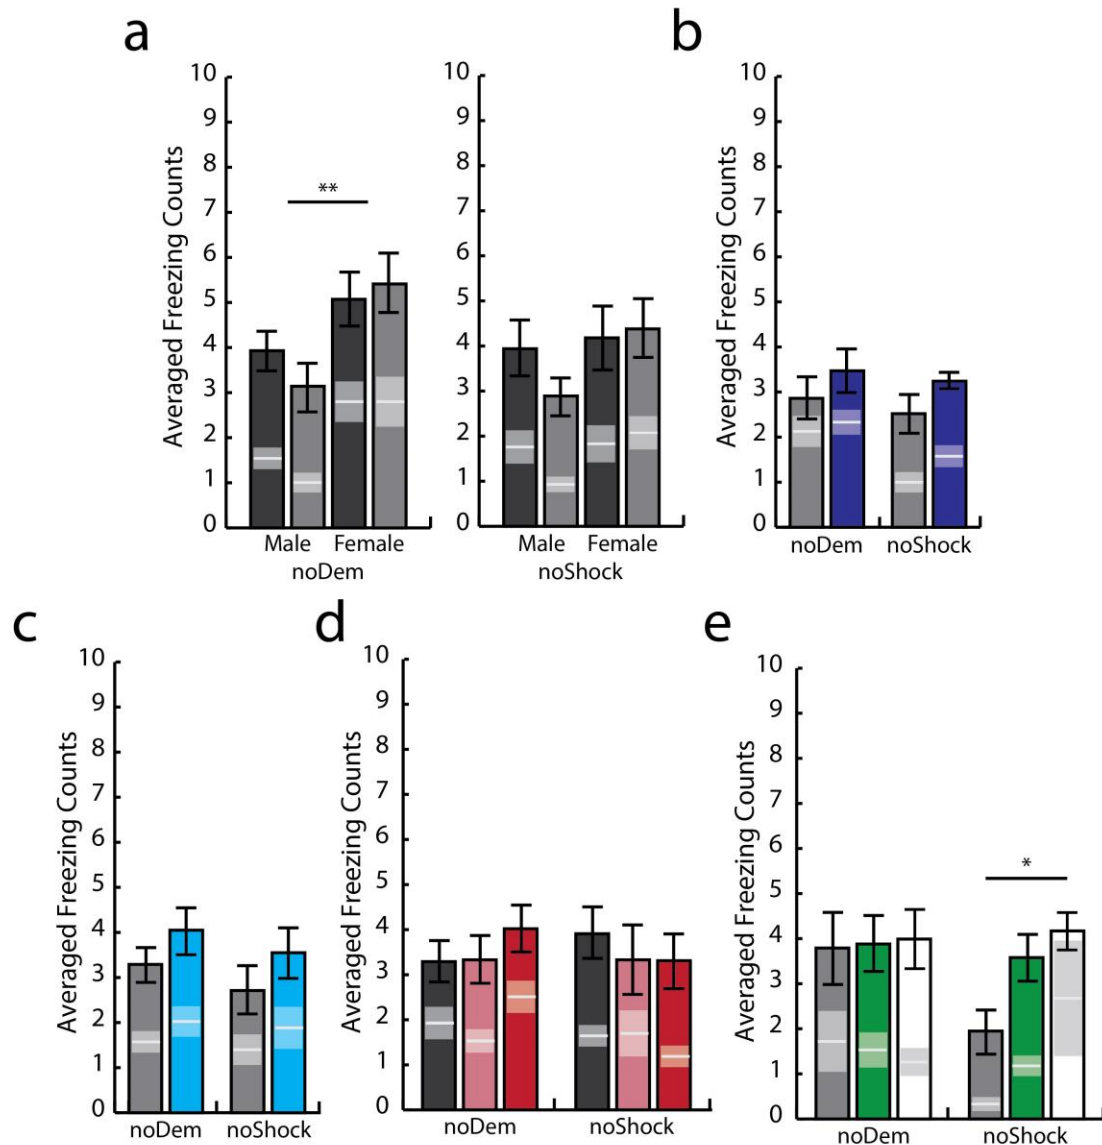

**Supplementary Figure 3. Non-specific observer freezing behavior in control conditioning experiments.** (a) Non-specific freezing behavior of familiar (black,  $n = 13$ ) and unfamiliar (gray,  $n = 13$ ) male and familiar (black,  $n = 10$ ) and unfamiliar (gray,  $n = 10$ ) female observer mice during (left) noDem (ANOVA: sex effect  $F_{1,45} = 9.29$ ,  $p = 0.004$ ; familiarity effect  $F_{1,45} = 0.166$ ,  $p = 0.685$ ; sex x familiarity interaction  $F_{3,45} = 0.990$ ,  $p = 0.325$ ) and (right) noShock (ANOVA: sex effect  $F_{1,45} = 2.04$ ,  $p = 0.160$ ; familiarity effect  $F_{1,45} = 0.49$ ,  $p = 0.487$ ; interaction effect  $F_{3,45} = 1.07$ ,  $p = 0.307$ ) control experiments. (b) Non-specific freezing behavior of male observer mice following acute intranasal oxytocin (blue,  $n = 12$ ) or saline (gray,  $n = 12$ ) during noDem (two-tailed student's  $t$  test:  $t(23) = 0.88$ ,  $p = 0.388$ ) and noShock (two-tailed student's  $t$  test:  $t(23) = 1.53$ ,  $p = 0.152$ ) control experiments. (c) Non-specific freezing behavior of male observer mice following chronic intranasal oxytocin (light blue,  $n = 11$ ) or saline (gray,  $n = 11$ ) during noDem (two-tailed student's  $t$  test:  $t(21) = 1.16$ ,  $p = 0.261$ ) and noShock (two-tailed student's  $t$  test:  $t(21) = 1.07$ ,  $p = 0.296$ ) control experiments. (d) Non-specific freezing behavior of male observer mice following saline (I.P., black,  $n = 12$ ), or 5mg/kg (I.P., pink,  $n = 12$ ) or 10mg/kg (I.P., red,  $n = 12$ ) OXTA during noDem (ANOVA:  $F_{2,35} = 0.65$ ,  $p = 0.529$ ) and noShock (ANOVA:  $F_{2,35} = 0.26$ ,  $p = 0.768$ ) control experiments. (e) Non-specific freezing behavior of male (*Oxt-Cre/+*) observer mice expressing *rM3D(Gs)* following CNO (I.P., green,  $n = 10$ ) or saline (I.P., gray,  $n = 9$ ) or expressing GFP following CNO (I.P., white,  $n = 10$ ) during noDem (ANOVA:  $F_{2,28} = 0.02$ ,  $p = 0.981$ ) and noShock (ANOVA:  $F_{2,28} = 5.18$ ,  $p = 0.013$ ) control experiments. Error bars represent s.e.m. \*  $p < 0.05$ ; \*\*  $p < 0.01$ .

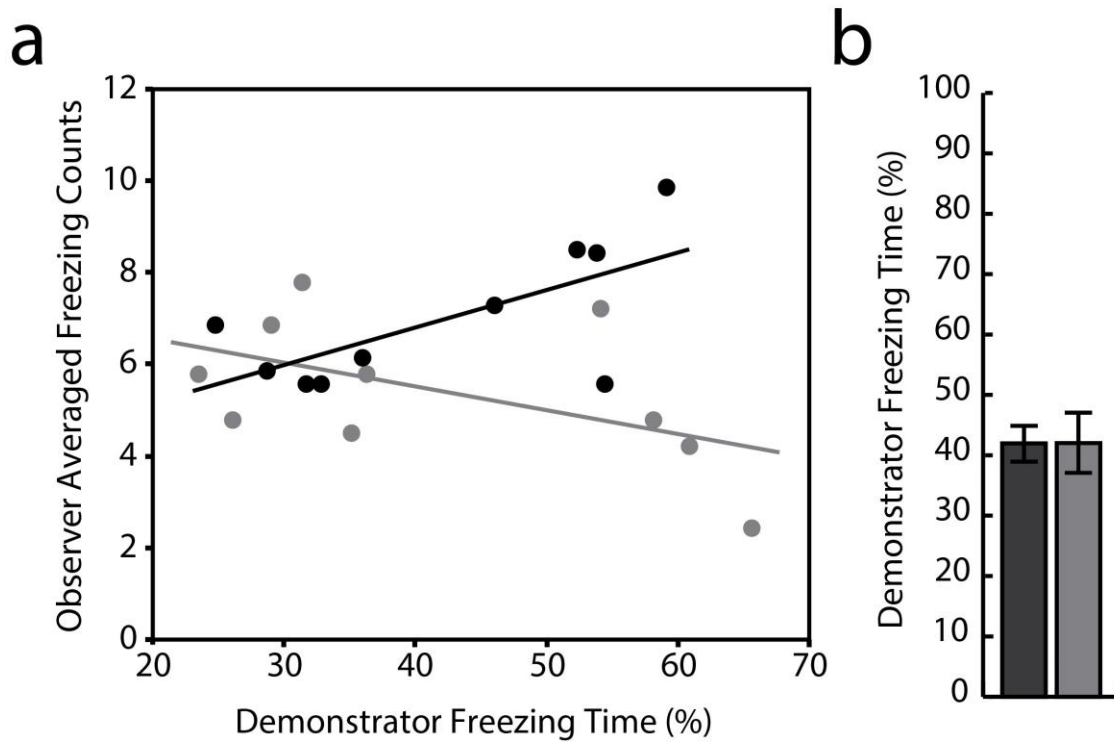

**Supplementary Figure 4. Relationship between observer and demonstrator freezing behavior.** (a) Observer freezing was correlated with the degree of freezing expressed by the demonstrator in familiar pairs (black,  $n = 10$ ; Pearson  $R^2 = 0.455$ ,  $p = 0.032$ ), but not in unfamiliar pairs (gray,  $n = 10$ ; Pearson  $R^2 = 0.264$ ,  $p = 0.129$ ). (b) Familiar and unfamiliar demonstrators exhibited equivalent freezing behavior during conditioning (two-tailed student's  $t$  test:  $t(19) = 0.007$ ,  $p = 0.997$ ).

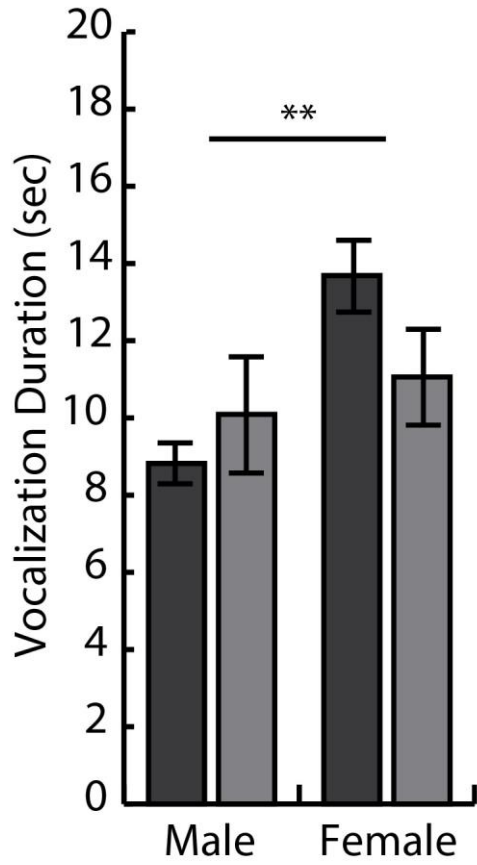

**Supplementary Figure 5. Demonstrator vocalizations.** Female demonstrators produced more vocalizations than males (ANOVA: effect of sex  $F_{1,43} = 6.37$ ,  $p = 0.016$ ). Error bars represent s.e.m. \*\*  $p < 0.01$ .

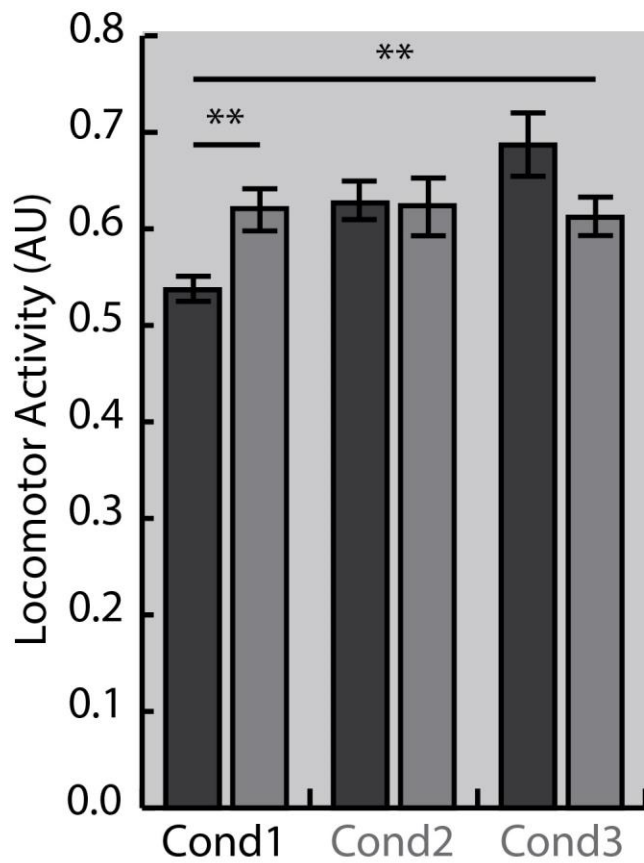

**Supplementary Figure 6. Increased locomotor activity across conditioning days in familiar male observers.** Averaged locomotor activity during acclimation of Cond1 was significantly lower in familiar male observers (two-tailed student's *t* test:  $t(25) = 3.08$ ,  $p = 0.008$ ) compared to unfamiliar observers (see also Fig. 1e) and increased significantly across subsequent conditioning days (repeated measure ANOVA:  $F_{5,77} = 3.86$ ,  $p = 0.004$ ; effect of familiarity  $F_{1,77} = 5.96$ ,  $p = 0.017$ ; effect of day  $F_{2,77} = 4.28$ ,  $p = 0.018$ ; familiarity x day interaction  $F_{2,77} = 5.36$ ,  $p = 0.007$ ). Error bars represent s.e.m. \*\*  $p < 0.01$ .

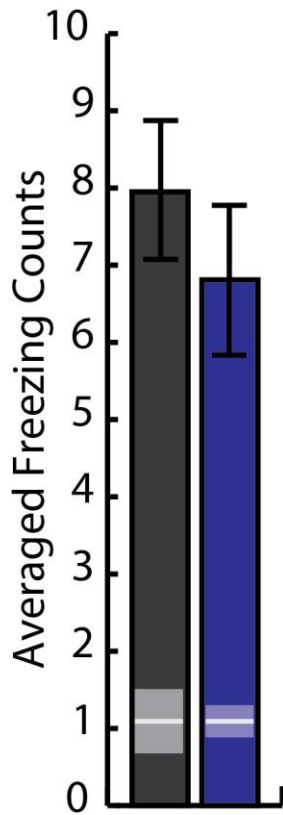

**Supplementary Figure 7. Freezing behavior in familiar male mice administered acute intranasal oxytocin.** Compared to saline-treated controls (black,  $n = 5$ ), familiar male observers treated with acute intranasal oxytocin (20ug/kg; blue,  $n = 5$ ) thirty minutes prior to demonstrator conditioning showed equivalent freezing (two-tailed student's  $t$  test:  $t(9) = 0.86$ ,  $p = 0.41$ ). Error bars represent s.e.m.

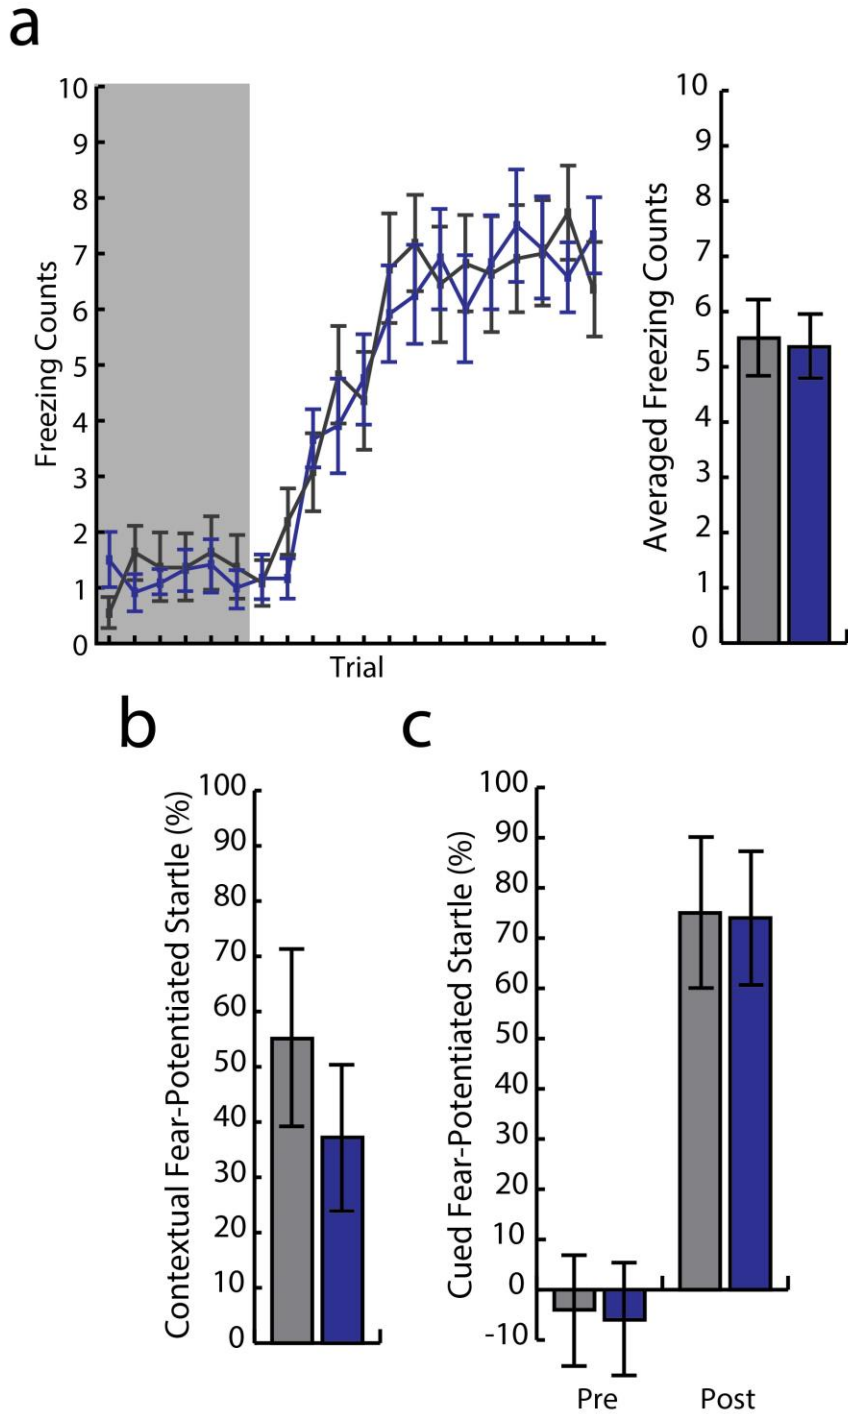

**Supplementary Figure 8. Pavlovian fear behaviors of mice following acute intranasal oxytocin.** Compared to saline-treated controls (gray,  $n = 11$ ), male mice treated with acute intranasal oxytocin (20ug/kg; blue,  $n = 12$ ) thirty minutes prior to Pavlovian conditioning showed equivalent (**a**) acquisition (**left**, across trials; **right**, averaged) (two-tailed student's  $t$  test:  $t(22) = 0.179$ ,  $p = 0.859$ ), and (**b**) expression of contextual (two-tailed student's  $t$  test:  $t(22) = 0.859$ ,  $p = 0.401$ ) and (**c**) cued fear-potentiated startle (post; two-tailed student's  $t$  test:  $t(22) = 0.03$ ,  $p = 0.975$ ). Error bars represent s.e.m.



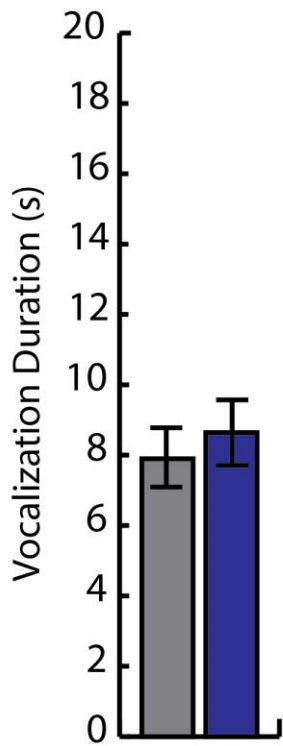

**Supplementary Figure 9. Demonstrator vocalizations in acute and chronic intranasal oxytocin experiments.** Demonstrators paired with observer mice administered intranasal oxytocin (acute and chronic; blue;  $n = 23$ ) produced equivalent vocalization durations, compared to demonstrators paired with saline control mice (gray;  $n = 23$ ) (ANOVA:  $F_{3,68} = 0.013$ ,  $p = 0.908$ ). Error bars represent s.e.m.

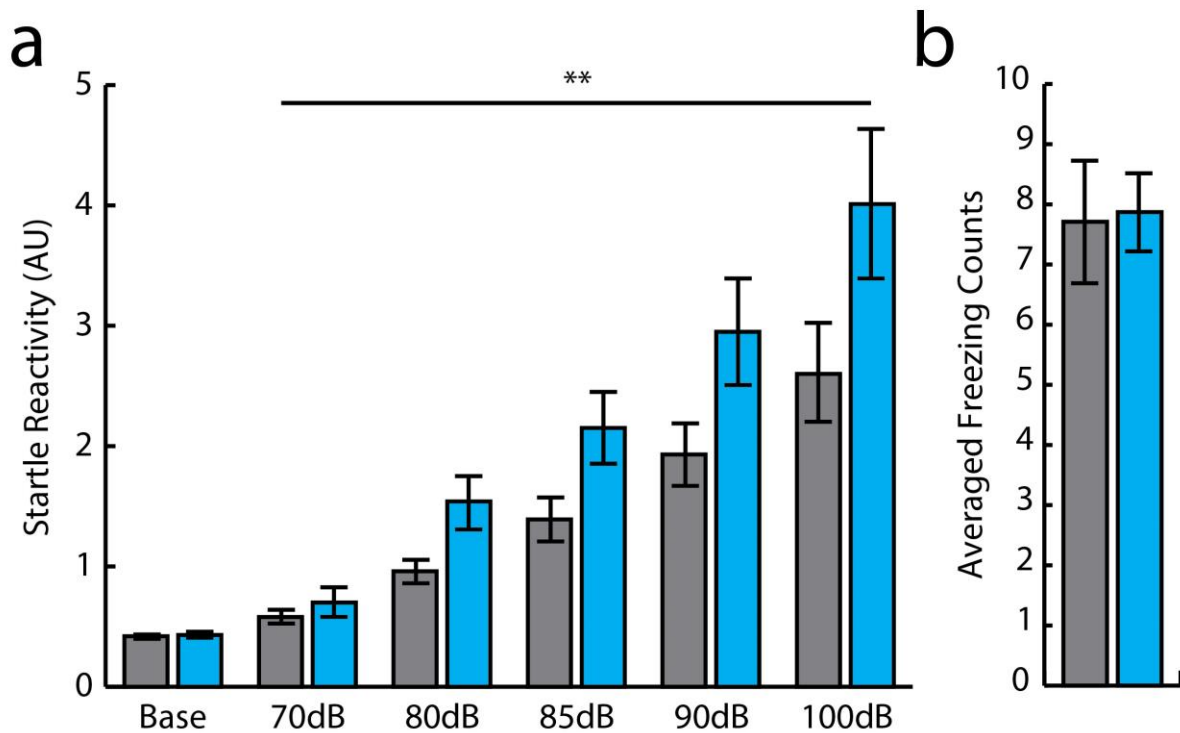

**Supplementary Figure 10. Startle reactivity and Pavlovian fear acquisition following chronic intranasal oxytocin.** (a) Startle reactivity was significantly elevated in mice administered chronic intranasal OXT (light blue,  $n = 11$ ) versus saline controls (gray,  $n = 11$ ) (excluding baseline; ANOVA:  $F_{9,109} = 10.578$ ,  $p < 0.0001$ ; effect of treatment,  $F_{1,109} = 8.98$ ,  $p = 0.004$ ; effect of level,  $F_{4,109} = 19.34$ ,  $p < 0.0001$ ; treatment x level interaction  $F_{9,109} = 1.05$ ,  $p = 0.387$ ). See Fig 3 for testing schedule. (b) Averaged freezing during acquisition of Pavlovian fear was equivalent between mice administered chronic intranasal oxytocin (light blue,  $n = 7$ ) or saline (gray,  $n = 6$ ) (two-tailed student's  $t$  test:  $t(12) = 0.134$ ,  $p = 0.896$ ). Error bars represent s.e.m. \*\*  $p < 0.01$ .

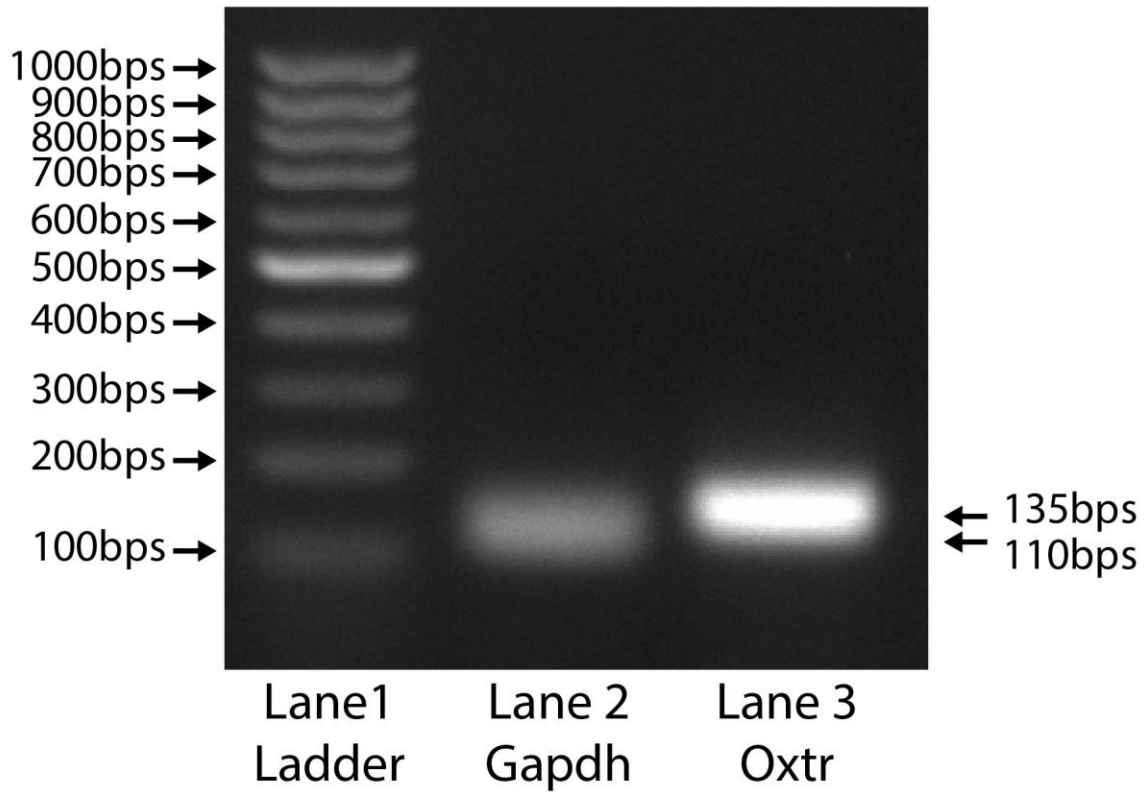

**Supplementary Figure 11. Confirmation of qRT-PCR amplicons.** Original gel blot for qRT-PCR amplicons of the *Gapdh* (110bps, Lane 2) and *Oxt* (135bps, Lane 3) transcripts at expected sizes. DNA base pair ladder is shown in Lane 1.

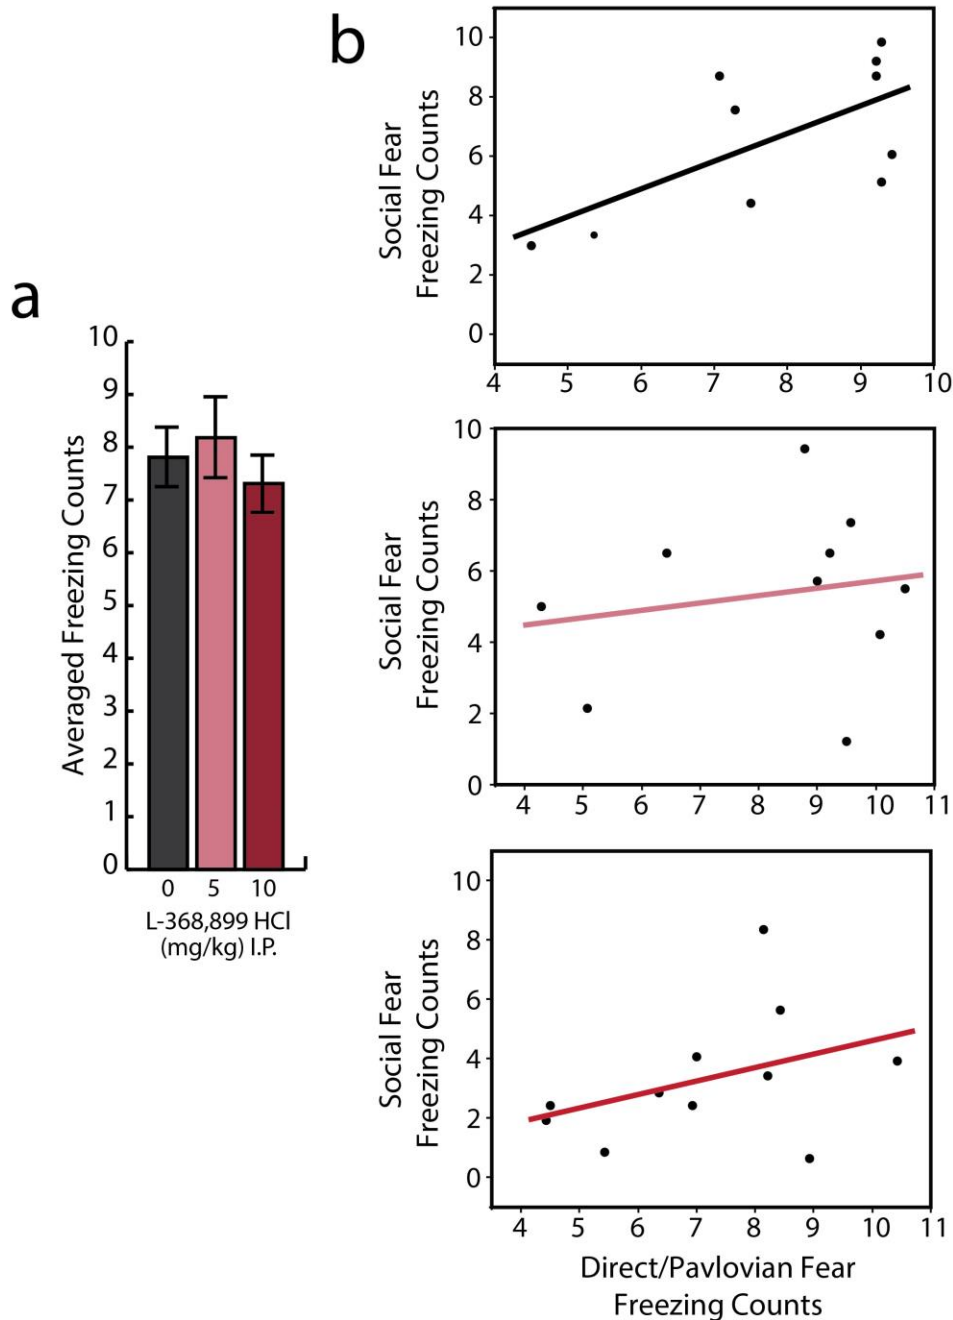

**Supplementary Figure 12. Pavlovian fear acquisition and correlations with social fear following systemic oxytocin antagonist.** (a) OXTA (5mg/kg,  $n = 9$ ; 10mg/kg,  $n = 12$ ; thirty minutes prior) did not disrupt direct acquisition of Pavlovian fear, compared to saline-treated familiar mice ( $n = 10$ ) (ANOVA:  $F_{2,30} = 0.506$ ,  $p = 0.608$ ) (b) Saline-treated observer mice displayed a significant correlation between socially and directly acquired fear (upper panel; Pearson  $R^2 = 0.434$ ,  $p = 0.038$ ), whereas this relationship was absent in mice treated with 5mg/kg (middle panel; Pearson  $R^2 = 0.035$ ,  $p = 0.606$ ) or 10mg/kg (bottom panel; Pearson  $R^2 = 0.160$ ,  $p = 0.194$ ) OXTA. Error bars represent s.e.m.

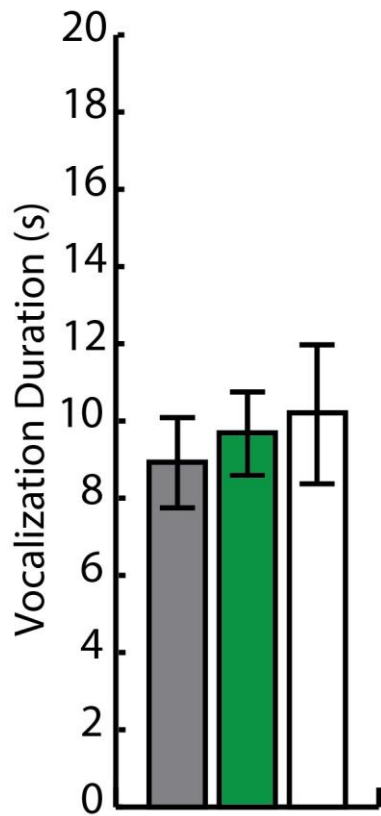

**Supplementary Figure 13. Demonstrator vocalizations in chemogenetic experiments.**

Demonstrators elicited equivalent vocalization durations for observer mice expressing rM3D(Gs) administered saline (gray;  $n = 9$ ) or CNO (3mg/kg, I.P.; green;  $n = 10$ ), and observer mice not expressing rM3D(Gs) administered CNO (white;  $n = 10$ ) (ANOVA:  $F_{2,29} = 0.215$ ,  $p = 0.807$ ). Error bars represent s.e.m.

**a**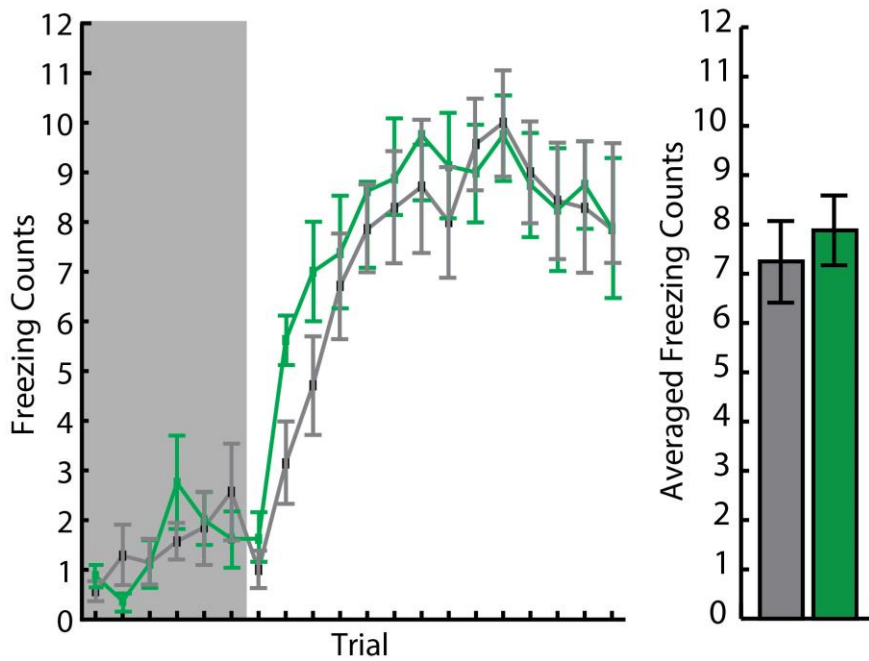**b**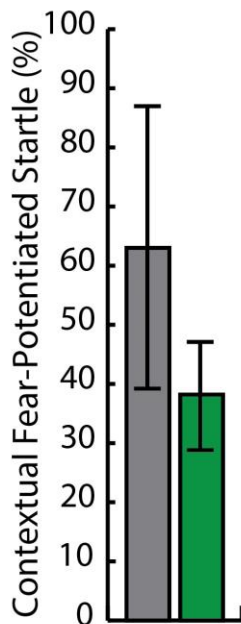**c**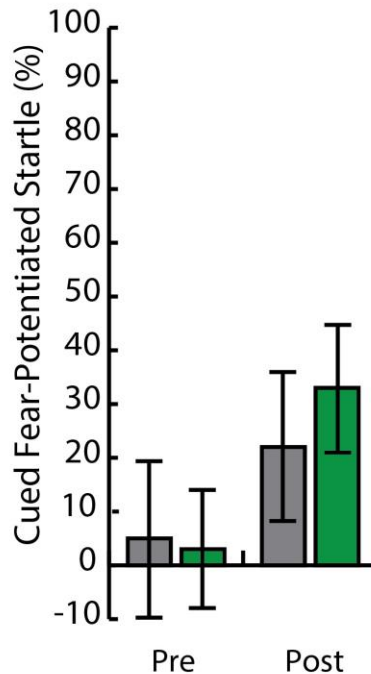

**Supplementary Figure 14. Pavlovian fear behaviors of chemogenetic mice.** In observer mice expressing the *rM3D(Gs)* receptor, saline (gray,  $n = 7$ ) and CNO (3mg/kg, *I.P.*; green,  $n = 8$ ) treatment thirty minutes prior to conditioning produced similar (a) acquisition (left, across trials; right, averaged) (two-tailed student's *t* test:  $t(14) = 1.380$ ,  $p = 0.190$ ), and expression of (b) contextual (two-tailed student's *t* test:  $t(14) = 0.969$ ,  $p = 0.362$ ) and (c) cue-specific fear (post; two-tailed student's *t* test:  $t(14) = 0.429$ ,  $p = 0.675$ ). Error bars represent *s.e.m.*

**Supplementary Table 1. Litter sizes for experimental groups.**

|                | <b>Fam/<br/>Male</b> | <b>Unfam/<br/>Male</b> | <b>Fam/<br/>Female</b> | <b>Unfam/<br/>Female</b> | <b>Unfam/<br/>Acute<br/>OXT</b> | <b>Unfam/<br/>Acute<br/>SAL</b> | <b>Unfam/<br/>Chronic<br/>OXT</b> | <b>Unfam/<br/>Chronic<br/>SAL</b> | <b>Unfam/<br/>CNO</b> | <b>Unfam/<br/>SAL</b> | <b>Fam/<br/>SAL</b> | <b>Fam/<br/>5mg/kg<br/>OXTA</b> | <b>Fam/<br/>10mg/kg<br/>OXTA</b> |
|----------------|----------------------|------------------------|------------------------|--------------------------|---------------------------------|---------------------------------|-----------------------------------|-----------------------------------|-----------------------|-----------------------|---------------------|---------------------------------|----------------------------------|
| <b>Average</b> | <b>8.00</b>          | <b>8.15</b>            | <b>8.30</b>            | <b>7.60</b>              | *                               | *                               | <b>7.63</b>                       | <b>5.66</b>                       | <b>7.80</b>           | <b>7.70</b>           | <b>7.50</b>         | <b>7.66</b>                     | <b>7.90</b>                      |
| <b>S.E.</b>    | 0.73                 | 0.37                   | 0.33                   | 0.58                     | *                               | *                               | 0.43                              | 0.92                              | 0.53                  | 0.58                  | 0.43                | 0.16                            | 0.58                             |
| <b>Sig?</b>    | n.s.                 |                        | n.s.                   |                          | n.s.                            |                                 | n.s.                              |                                   | n.s.                  |                       | n.s.                |                                 |                                  |

\* Data not available.

**Supplementary Movie 1. Freezing behavior of a familiar observer male mouse (bottom) in response to the conditioning of a demonstrator conspecific (top).**

**Supplementary Movie 2. Escape behavior of a familiar observer male mouse in response to the conditioning of a demonstrator conspecific (during Cond(open))**
