# Supplementary material for: Oxytocin enhances observational fear in mice
Source: PubMed Central journal article supplement (PMC5727393; doi:10.1038/s41467-017-02279-5), 2017-12-13
Supplement: 41467_2017_2279_MOESM3_ESM.pdf [file 41467_2017_2279_MOESM3_ESM.pdf]

## **Description of Additional Supplementary Files**

File Name: Supplementary Movie 1

Description: Freezing behavior of a familiar observer male mouse (bottom) in response to the conditioning of a demonstrator conspecific (top).

File Name: Supplementary Movie 2

Description: Escape behavior of a familiar observer male mouse in response to the conditioning of a demonstrator conspecific (during Cond(open))
